# Supplementary material for: Bio-Stimulant for Improving Simmondsia chinensis Secondary Metabolite Production, as Well as Antimicrobial Activity and Wound Healing Abilities
Source: MDPI journal article supplement (doi:10.3390/plants12183311), 2023-09-19
Supplement: s1 [file s1]

**Supplementary Table S1. Components identified by GC–MS analysis in the *S. chinensis* Lines methanolic leave extracts from different line groups. Each area [%] was calculated from the measurements obtained from the methanolic extracts of 3 plantlets from [rooting stage].**

| Laser treatments [min] | <i>S. chinensis</i> Lines | Peak | Essential Oil Compounds                 | RT, min | Area, % | Molecular Weight | Molecular Formula           |
|------------------------|---------------------------|------|-----------------------------------------|---------|---------|------------------|-----------------------------|
| Control                | 1                         | 1    | 4-Methyl-1,3-dioxane                    | 10.71   | 0.29    | 102.13           | C5H10O2                     |
|                        |                           | 2    | N-Methyl-L-proline                      | 11.636  | 14.46   | 129.16           | C6H11NO2                    |
|                        |                           | 3    | 1-methylpyrrolidine-2-carboxylic acid   | 11.758  | 7.53    | 129.16           | C6H11NO2                    |
|                        |                           | 4    | [R]-Dimethyl 2-hydroxysuccinate         | 13.338  | 0.09    | 162.14           | C6H10O5                     |
|                        |                           | 5    | hexahydro-1,3-diazocine-2[1H]-thione    | 14.149  | 0.08    | 144.24           | C6H12N2S                    |
|                        |                           | 6    | 2,6-Diethylcyclohexanone                | 14.211  | 0.06    | 154.25           | C10H18O                     |
|                        |                           | 7    | 1-[4-hydroxy-3-methylphenyl]ethanone    | 14.734  | 0.63    | 150.17           | C9H10O2                     |
|                        |                           | 8    | Pyrrolidine                             | 16.206  | 0.08    | 71.12            | <a href="#">C4H9N</a>       |
|                        |                           | 9    | Methyl alpha-D-glucopyranoside          | 17.34   | 3.9     | 194.18           | C7H14O6                     |
|                        |                           | 10   | 2-Methoxyphenylacetonitrile             | 17.674  | 0.21    | 147.17           | C9H9NO                      |
|                        |                           | 11   | [4-hydroxyphenyl] acetonitrile          | 17.961  | 0.75    | 133.15           | C8H7NO                      |
|                        |                           | 12   | 2-Hydroxy-3-methoxybenzaldehyde         | 19.085  | 0.33    | 152.15           | C8H8O3                      |
|                        |                           | 13   | Acetosyringone                          | 19.479  | 0.21    | 196.2            | <a href="#">C10H12O4</a>    |
|                        |                           | 15   | levoglucosan                            | 20.382  | 3.86    | 162.14           | C6H10O5                     |
|                        |                           | 16   | D-Glucose                               | 20.697  | 2.92    | 180.16           | C6H12O6                     |
|                        |                           | 17   | 1-Methoxy-1,2,3,4-tetrahydronaphthalene | 21.05   | 0.44    | 162.23           | C11H14O                     |
|                        |                           | 18   | D-Fructose, 3-O-methyl                  | 21.782  | 60.15   | 192.18           | C7H14O6                     |
|                        |                           | 19   | Arbutin                                 | 22.401  | 0.3     | 272.25           | C12H16O7                    |
|                        |                           | 21   | Methyl palmitate                        | 25.217  | 0.21    | 270.5            | C17H34O2                    |
|                        |                           | 22   | Methyl alpha-D-glucopyranoside          | 25.413  | 0.29    | 194.18           | C7H14O6                     |
|                        |                           | 23   | L-[+]-Ascorbic acid 2,6-dihexadecanoate | 25.682  | 0.6     | 652.9            | C38H68O8                    |
|                        |                           | 24   | Ethyl linolenate                        | 28.528  | 0.65    | 306.5            | C20H34O2                    |
| 10                     | 5                         | 1    | L-Thymidine                             | 8.869   | 0.34    | 242.23           | C10H14N2O5                  |
|                        |                           | 2    | Undecane                                | 9.645   | 1.02    | 156.31           | <a href="#">C11H24</a>      |
|                        |                           | 3    | Oleic acid                              | 10.722  | 0.41    | 354.6            | <a href="#">C21H42O2Si</a>  |
|                        |                           | 4    | N-Methyl-L-proline                      | 11.72   | 5.47    | 129.16           | C6H11NO2                    |
|                        |                           | 5    | Cyclotetrasiloxane                      | 12.913  | 0.24    | 296.621          | C8H24O4Si4                  |
|                        |                           | 6    | Propanoic acid                          | 13.269  | 0.69    | 162.14           | C6H10O5                     |
|                        |                           | 8    | 1,3,5-Triazin-2[1H]-one                 | 14.238  | 0.11    | 97.08            | <a href="#">C3H3N3O</a>     |
|                        |                           | 9    | 1-[4-hydroxy-3-methylphenyl]ethanone    | 14.75   | 1.35    | 150.17           | C9H10O2                     |
|                        |                           | 10   | Cyclopentasiloxane                      | 15.971  | 0.16    | 370.77           | <a href="#">C10H30O5Si5</a> |
|                        |                           | 11   | Pyrrolidine                             | 16.282  | 0.15    | 71.12            | <a href="#">C4H9N</a>       |
|                        |                           | 12   | Methyl alpha-D-glucopyranoside          | 17.229  | 11.82   | 194.18           | C7H14O6                     |
|                        |                           | 13   | 1H-Indole, 2,3-dihydro-4-methyl         | 17.676  | 0.13    | 133.19           | C9H11N                      |
|                        |                           | 14   | 4-Hydroxybenzyl cyanide                 | 17.965  | 0.34    | 133.15           | C8H7NO                      |
|                        |                           | 15   | Arbutin                                 | 18.156  | 0.06    | 272.25           | C12H16O7                    |
|                        |                           | 17   | Acetosyringone                          | 19.491  | 0.09    | 196.2            | <a href="#">C10H12O4</a>    |
|                        |                           | 18   | 4-Methylpentanoic acid                  | 19.683  | 0.42    | 116.16           | C6H12O2                     |
|                        |                           | 20   | levoglucosan                            | 20.301  | 2.12    | 162.14           | C6H10O5                     |
|                        |                           | 21   | D-Glucose                               | 20.653  | 0.59    | 180.16           | C6H12O6                     |

|    |   |    |                                                                  |        |       |          |                       |
|----|---|----|------------------------------------------------------------------|--------|-------|----------|-----------------------|
| 10 | 8 | 22 | D-Fructose, 1-O-methyl                                           | 21.228 | 68.53 | 192.18   | C7H14O6               |
|    |   | 23 | Hexanoic acid                                                    | 22.403 | 0.09  | 116.16   | CH3[CH2]4COOH         |
|    |   | 24 | 16-heptadecenal                                                  | 23.945 | 0.29  | 252.4    | C17H32O               |
|    |   | 25 | Methyl palmitate                                                 | 25.231 | 1.14  | 270.5    | C17H34O2              |
|    |   | 26 | L-[+]-Ascorbic acid 2,6-dihexadecanoate                          | 25.687 | 0.58  | 652.9    | C38H68O8              |
|    |   | 27 | 9-Octadecenoic acid, methyl ester                                | 27.893 | 1.63  | 296.4879 | C19H36O2              |
|    |   | 28 | Phytol                                                           | 28.062 | 0.4   | 296.5    | C20H40O               |
|    |   | 1  | Propanenitrile, 3,3'-iminobis                                    | 6.345  | 1.32  | 123.16   | C6H9N3                |
|    |   | 2  | L-Thymidine                                                      | 8.874  | 0.18  | 242.23   | C10H14N2O5            |
|    |   | 3  | Undecane                                                         | 9.651  | 0.14  | 156.31   | C11H24                |
|    |   | 4  | Octanoic acid                                                    | 10.726 | 0.69  | 228.37   | C14H28O2              |
|    |   | 5  | Cyclotetrasiloxane                                               | 10.859 | 0.78  | 296.621  | C8H24O4Si4            |
|    |   | 6  | N-Methyl-L-proline                                               | 11.935 | 0.61  | 129.16   | C6H11NO2              |
|    |   | 7  | Propanoic acid                                                   | 13.277 | 0.49  | 162.14   | C6H10O5               |
|    |   | 8  | trans-2-Octen-1-ol                                               | 13.763 | 0.04  | 128.21   | C8H16O                |
|    |   | 9  | hexahydro-1,3-diazocine-2[1H]-thione                             | 14.057 | 0.73  | 144.24   | C6H12N2S              |
|    |   | 10 | 1-[4-hydroxy-3-methylphenyl]ethanone                             | 14.753 | 1.17  | 150.17   | C9H10O2               |
|    |   | 11 | Pyrrolidine                                                      | 16.223 | 0.49  | 71.12    | <a href="#">C4H9N</a> |
|    |   | 12 | Sucrose                                                          | 17.411 | 9.6   | 342.3    | C12H22O11             |
|    |   | 13 | 4-Hydroxybenzyl cyanide                                          | 17.687 | 0.21  | 133.15   | C8H7NO                |
|    |   | 14 | [4-hydroxyphenyl] acetonitrile                                   | 17.968 | 0.76  | 133.15   | C8H7NO                |
|    |   | 15 | levoglucosan                                                     | 18.254 | 0.24  | 162.14   | C6H10O5               |
|    |   | 16 | L-Pyrogutamic acid                                               | 18.813 | 6.36  | 129.11   | C5H7NO3               |
|    |   | 17 | 2-Hydroxy-3-methoxybenzaldehyde                                  | 19.099 | 1.56  | 152.15   | C8H8O3                |
|    |   | 18 | Phenol, 4-methoxy-3-[methoxymethyl]                              | 19.297 | 0.95  | 168.19   | C9H12O3               |
|    |   | 19 | 2-Phenylcyclopropanecarbonitrile                                 | 19.495 | 1.44  | 143.18   | C10H9N                |
|    |   | 21 | Methyl alpha-D-glucopyranoside                                   | 20.394 | 5.48  | 194.18   | C7H14O6               |
|    |   | 22 | alpha-D-Glucopyranoside,                                         | 20.716 | 2.15  | 342.3    | C12H22O11             |
|    |   | 23 | Methyl alpha-D-mannopyranoside                                   | 21.5   | 53.7  | 194.18   | C7H14O6               |
|    |   | 24 | Beta-D-allose                                                    | 22.42  | 0.15  | 180.16   | C6H12O6               |
|    |   | 25 | D-Glucose                                                        | 22.702 | 0.19  | 180.16   | C6H12O6               |
|    |   | 28 | Pentadecanal                                                     | 23.947 | 0.07  | 226.4    | C15H30O               |
|    |   | 29 | Methyl palmitate                                                 | 25.233 | 0.2   | 270.5    | C17H34O2              |
|    |   | 30 | L-[+]-Ascorbic acid 2,6-dihexadecanoate                          | 25.692 | 0.5   | 652.9    | C38H68O8              |
|    |   | 31 | Methyl oleate                                                    | 27.896 | 0.08  | 296.5    | C19H36O2              |
|    |   | 32 | Phytol                                                           | 28.067 | 0.17  | 296.5    | C20H40O               |
|    |   | 33 | Cetyl alcohol                                                    | 28.551 | 0.08  | 242.44   | C16H34O               |
|    |   | 34 | 2-[[4-Methyl-1-oxo-2,3-dihydro-1H-inden-2-yl]methyl]benzoic acid | 36.28  | 0.21  | 280.3    | C18H16O3              |
|    |   | 36 | 4',5,6,7-Tetramethoxyflavone                                     | 43.219 | 1.04  | 342.3    | C19H18O6              |

| Laser treatments [min] | <i>S. chinensis</i> Lines | Peak | Essential Oil Compounds                 | RT, min | Area, % | Molecular Weight | Molecular Formula           |
|------------------------|---------------------------|------|-----------------------------------------|---------|---------|------------------|-----------------------------|
| Control                | 1                         | 1    | 4-Methyl-1,3-dioxane                    | 10.71   | 0.29    | 102.13           | C5H10O2                     |
|                        |                           | 2    | N-Methyl-L-proline                      | 11.636  | 14.46   | 129.16           | C6H11NO2                    |
|                        |                           | 3    | 1-methylpyrrolidine-2-carboxylic acid   | 11.758  | 7.53    | 129.16           | C6H11NO2                    |
|                        |                           | 4    | [R]-Dimethyl 2-hydroxysuccinate         | 13.338  | 0.09    | 162.14           | C6H10O5                     |
|                        |                           | 5    | hexahydro-1,3-diazocine-2[1H]-thione    | 14.149  | 0.08    | 144.24           | C6H12N2S                    |
|                        |                           | 6    | 2,6-Diethylcyclohexanone                | 14.211  | 0.06    | 154.25           | C10H18O                     |
|                        |                           | 7    | 1-[4-hydroxy-3-methylphenyl]ethanone    | 14.734  | 0.63    | 150.17           | C9H10O2                     |
|                        |                           | 8    | Pyrrolidine                             | 16.206  | 0.08    | 71.12            | <a href="#">C4H9N</a>       |
|                        |                           | 9    | Methyl alpha-D-glucopyranoside          | 17.34   | 3.9     | 194.18           | C7H14O6                     |
|                        |                           | 10   | 2-Methoxyphenylacetone nitrile          | 17.674  | 0.21    | 147.17           | C9H9NO                      |
|                        |                           | 11   | [4-hydroxyphenyl] acetone nitrile       | 17.961  | 0.75    | 133.15           | C8H7NO                      |
|                        |                           | 12   | 2-Hydroxy-3-methoxybenzaldehyde         | 19.085  | 0.33    | 152.15           | C8H8O3                      |
|                        |                           | 13   | Acetosyringone                          | 19.479  | 0.21    | 196.2            | <a href="#">C10H12O4</a>    |
|                        |                           | 15   | levoglucosan                            | 20.382  | 3.86    | 162.14           | C6H10O5                     |
|                        |                           | 16   | D-Glucose                               | 20.697  | 2.92    | 180.16           | C6H12O6                     |
|                        |                           | 17   | 1-Methoxy-1,2,3,4-tetrahydronaphthalene | 21.05   | 0.44    | 162.23           | C11H14O                     |
|                        |                           | 18   | D-Fructose, 3-O-methyl                  | 21.782  | 60.15   | 192.18           | C7H14O6                     |
|                        |                           | 19   | Arbutin                                 | 22.401  | 0.3     | 272.25           | C12H16O7                    |
|                        |                           | 21   | Methyl palmitate                        | 25.217  | 0.21    | 270.5            | C17H34O2                    |
|                        |                           | 22   | Methyl alpha-D-glucopyranoside          | 25.413  | 0.29    | 194.18           | C7H14O6                     |
|                        |                           | 23   | L-[+]-Ascorbic acid 2,6-dihexadecanoate | 25.682  | 0.6     | 652.9            | C38H68O8                    |
|                        |                           | 24   | Ethyl linolenate                        | 28.528  | 0.65    | 306.5            | C20H34O2                    |
| 10                     | 5                         | 1    | L-Thymidine                             | 8.869   | 0.34    | 242.23           | C10H14N2O5                  |
|                        |                           | 2    | Undecane                                | 9.645   | 1.02    | 156.31           | <a href="#">C11H24</a>      |
|                        |                           | 3    | Oleic acid                              | 10.722  | 0.41    | 354.6            | <a href="#">C21H42O2Si</a>  |
|                        |                           | 4    | N-Methyl-L-proline                      | 11.72   | 5.47    | 129.16           | C6H11NO2                    |
|                        |                           | 5    | Cyclotetrasiloxane                      | 12.913  | 0.24    | 296.621          | C8H24O4Si4                  |
|                        |                           | 6    | Propanoic acid                          | 13.269  | 0.69    | 162.14           | C6H10O5                     |
|                        |                           | 8    | 1,3,5-Triazin-2[1H]-one                 | 14.238  | 0.11    | 97.08            | <a href="#">C3H3N3O</a>     |
|                        |                           | 9    | 1-[4-hydroxy-3-methylphenyl]ethanone    | 14.75   | 1.35    | 150.17           | C9H10O2                     |
|                        |                           | 10   | Cyclopentasiloxane                      | 15.971  | 0.16    | 370.77           | <a href="#">C10H30O5Si5</a> |
|                        |                           | 11   | Pyrrolidine                             | 16.282  | 0.15    | 71.12            | <a href="#">C4H9N</a>       |
|                        |                           | 12   | Methyl alpha-D-glucopyranoside          | 17.229  | 11.82   | 194.18           | C7H14O6                     |
|                        |                           | 13   | 1H-Indole, 2,3-dihydro-4-methyl         | 17.676  | 0.13    | 133.19           | C9H11N                      |
|                        |                           | 14   | 4-Hydroxybenzyl cyanide                 | 17.965  | 0.34    | 133.15           | C8H7NO                      |
|                        |                           | 15   | Arbutin                                 | 18.156  | 0.06    | 272.25           | C12H16O7                    |
|                        |                           | 17   | Acetosyringone                          | 19.491  | 0.09    | 196.2            | <a href="#">C10H12O4</a>    |
|                        |                           | 18   | 4-Methylpentanoic acid                  | 19.683  | 0.42    | 116.16           | C6H12O2                     |
|                        |                           | 20   | levoglucosan                            | 20.301  | 2.12    | 162.14           | C6H10O5                     |
|                        |                           | 21   | D-Glucose                               | 20.653  | 0.59    | 180.16           | C6H12O6                     |
|                        |                           | 22   | D-Fructose, 1-O-methyl                  | 21.228  | 68.53   | 192.18           | C7H14O6                     |
|                        |                           | 23   | Hexanoic acid                           | 22.403  | 0.09    | 116.16           | CH3[CH2]4COOH               |

|    |   |    |                                                                  |        |      |          |                       |
|----|---|----|------------------------------------------------------------------|--------|------|----------|-----------------------|
| 10 | 8 | 24 | 16-heptadecenal                                                  | 23.945 | 0.29 | 252.4    | C17H32O               |
|    |   | 25 | Methyl palmitate                                                 | 25.231 | 1.14 | 270.5    | C17H34O2              |
|    |   | 26 | l-[+]-Ascorbic acid 2,6-dihexadecanoate                          | 25.687 | 0.58 | 652.9    | C38H68O8              |
|    |   | 27 | 9-Octadecenoic acid, methyl ester                                | 27.893 | 1.63 | 296.4879 | C19H36O2              |
|    |   | 28 | Phytol                                                           | 28.062 | 0.4  | 296.5    | C20H40O               |
|    |   | 1  | Propanenitrile, 3,3'-iminobis                                    | 6.345  | 1.32 | 123.16   | C6H9N3                |
|    |   | 2  | L-Thymidine                                                      | 8.874  | 0.18 | 242.23   | C10H14N2O5            |
|    |   | 3  | Undecane                                                         | 9.651  | 0.14 | 156.31   | C11H24                |
|    |   | 4  | Octanoic acid                                                    | 10.726 | 0.69 | 228.37   | C14H28O2              |
|    |   | 5  | Cyclotetrasiloxane                                               | 10.859 | 0.78 | 296.621  | C8H24O4Si4            |
|    |   | 6  | N-Methyl-L-proline                                               | 11.935 | 0.61 | 129.16   | C6H11NO2              |
|    |   | 7  | Propanoic acid                                                   | 13.277 | 0.49 | 162.14   | C6H10O5               |
|    |   | 8  | trans-2-Octen-1-ol                                               | 13.763 | 0.04 | 128.21   | C8H16O                |
|    |   | 9  | hexahydro-1,3-diazocine-2[1H]-thione                             | 14.057 | 0.73 | 144.24   | C6H12N2S              |
|    |   | 10 | 1-[4-hydroxy-3-methylphenyl]ethanone                             | 14.753 | 1.17 | 150.17   | C9H10O2               |
|    |   | 11 | Pyrrolidine                                                      | 16.223 | 0.49 | 71.12    | <a href="#">C4H9N</a> |
|    |   | 12 | Sucrose                                                          | 17.411 | 9.6  | 342.3    | C12H22O11             |
|    |   | 13 | 4-Hydroxybenzyl cyanide                                          | 17.687 | 0.21 | 133.15   | C8H7NO                |
|    |   | 14 | [4-hydroxyphenyl] acetonitrile                                   | 17.968 | 0.76 | 133.15   | C8H7NO                |
|    |   | 15 | levoglucosan                                                     | 18.254 | 0.24 | 162.14   | C6H10O5               |
|    |   | 16 | L-Pyroglutamic acid                                              | 18.813 | 6.36 | 129.11   | C5H7NO3               |
|    |   | 17 | 2-Hydroxy-3-methoxybenzaldehyde                                  | 19.099 | 1.56 | 152.15   | C8H8O3                |
|    |   | 18 | Phenol, 4-methoxy-3-[methoxymethyl]                              | 19.297 | 0.95 | 168.19   | C9H12O3               |
|    |   | 19 | 2-Phenylcyclopropanecarbonitrile                                 | 19.495 | 1.44 | 143.18   | C10H9N                |
|    |   | 21 | Methyl alpha-D-glucopyranoside                                   | 20.394 | 5.48 | 194.18   | C7H14O6               |
|    |   | 22 | alpha-D-Glucopyranoside,                                         | 20.716 | 2.15 | 342.3    | C12H22O11             |
|    |   | 23 | Methyl alpha-D-mannopyranoside                                   | 21.5   | 53.7 | 194.18   | C7H14O6               |
|    |   | 24 | Beta-D-allose                                                    | 22.42  | 0.15 | 180.16   | C6H12O6               |
|    |   | 25 | D-Glucose                                                        | 22.702 | 0.19 | 180.16   | C6H12O6               |
|    |   | 28 | Pentadecanal                                                     | 23.947 | 0.07 | 226.4    | C15H30O               |
|    |   | 29 | Methyl palmitate                                                 | 25.233 | 0.2  | 270.5    | C17H34O2              |
|    |   | 30 | l-[+]-Ascorbic acid 2,6-dihexadecanoate                          | 25.692 | 0.5  | 652.9    | C38H68O8              |
|    |   | 31 | Methyl oleate                                                    | 27.896 | 0.08 | 296.5    | C19H36O2              |
|    |   | 32 | Phytol                                                           | 28.067 | 0.17 | 296.5    | C20H40O               |
|    |   | 33 | Cetyl alcohol                                                    | 28.551 | 0.08 | 242.44   | C16H34O               |
|    |   | 34 | 2-[[4-Methyl-1-oxo-2,3-dihydro-1H-inden-2-yl]methyl]benzoic acid | 36.28  | 0.21 | 280.3    | C18H16O3              |
|    |   | 36 | 4',5,6,7-Tetramethoxyflavone                                     | 43.219 | 1.04 | 342.3    | C19H18O6              |
